# Supplementary material for: Antibody-dependent enhancement (ADE) of SARS-CoV-2 pseudoviral infection requires FcγRIIB and virus-antibody complex with bivalent interaction
Source: PubMed Central journal article supplement (PMC8948278; doi:10.1038/s42003-022-03207-0), 2022-03-24
Supplement: 42003_2022_3207_MOESM2_ESM.pdf [file 42003_2022_3207_MOESM2_ESM.pdf]

## Description of Additional Supplementary Files

**File name:** Supplementary Data 1

**Description:** Source data.
